# Supplementary material
Source: publisher site journal article supplement (https://www.dovepress.com/article/323491)
Supplement: Supplementary file 1 [file get_supplementary_file.php]

Supplementary table 1 Meta-analysis of the association between the IFN-γ +874 T/A polymorphism and systemic lupus erythematosus risk.

| Genetic contrasts | Random/fixed effect model | OR (95 % CI) | *P* | I-squared (%) | *P* for heterogeneity |
| --- | --- | --- | --- | --- | --- |
| TA vs. TT | Random | 1.36(1.04, 1.76) | **0.022** | 55.5 | 0.036 |
| AA vs. TT | Fixed | 1.86(1.32,2.64) | **0.000** | 0.0 | 0.664 |
| TA + AA vs. TT | Fixed | 1.26(1.11, 1.44) | **0.000** | 38.7 | 0.134 |
| AA vs. TA + TT | Random | 1.14(0.66, 1.95) | 0.649 | 69.8 | 0.003 |
| A vs. T | Fixed | 1.21(1.09, 1.34) | **0.001** | 0.0 | 0.734 |

* Bold values are statistically significant (*P* < 0.05)

Supplementary table 2 Summary of the subgroup analysis by ethnicity regarding the association between the IFN-γ +874 T/A polymorphism and systemic lupus erythematosus risk.

| Genetic contrasts | Category | Category | Numbers of study | OR (95% CI) | *P*-value |
| --- | --- | --- | --- | --- | --- |
| TA vs. TT | Ethnicity | Asian | 5 | 1.20(1.02, 1.41) | **0.028** |
|  |  | Caucasian | 2 | 3.36(0.59, 19.08) | 0.171 |
| AA vs. TT | Ethnicity | Asian | 5 | 1.98(1.37, 2.85) | **0.000** |
|  |  | Caucasian | 2 | 1.06(0.33, 3.35) | 0.924 |
| TA + AA vs. TT | Ethnicity | Asian | 5 | 1.23(1.08, 1.41) | **0.002** |
|  |  | Caucasian | 2 | 2.70(0.49, 15.03) | 0.256 |
| AA vs. TA + TT | Ethnicity | Asian | 5 | 1.53(1.04, 2.26) | **0.033** |
|  |  | Caucasian | 2 | 0.29(0.13, 0.67) | **0.004** |
| A vs. T | Ethnicity | Asian | 5 | 1.23(1.10, 1.38) | **0.000** |
|  |  | Caucasian | 2 | 0.95(0.66, 1.37) | 0.780 |

* Bold values are statistically significant (*P* < 0.05)
